# Supplementary material for: The back-deposition of dissolved Mn2+ to MnO2 cathodes for stable cycling in aqueous zinc batteries
Source: Royal Society of Chemistry journal article supplement (doi:10.1039/d2cc00334a), 2022-01-01
Supplement: d2cc00334a1.pdf [file d2cc00334a1.pdf]

## Supporting Information

### **The back-deposition of dissolved Mn<sup>2+</sup> to MnO<sub>2</sub> cathodes for stable cycling in aqueous zinc batteries**

Xianpeng Yang, Zhongqiu Jia, Wanlong Wu, Hua-Yu Shi, Zirui Lin, Cuicui Li, Xiao-Xia Liu\* and Xiaoqi Sun\*

Department of Chemistry, Northeastern University, 3-11 Wenhua Road, Shenyang, 110819, China

\*Corresponding authors. E-mail: xxliu@mail.neu.edu.cn, sunxiaoqi@mail.neu.edu.cn

## 1. Experimental Section

**1.1 Synthesis of MnO<sub>2</sub>.** The  $\alpha$ -phase MnO<sub>2</sub> was obtained by mixing 0.3506 g KMnO<sub>4</sub>, 1.65 mL HCl (36 ~ 38 %) and 35 mL water in a 50 mL autoclave, followed by heat treatment at 140 °C for 16 h.<sup>[1]</sup> The  $\beta$ -phase MnO<sub>2</sub> was obtained by mixing 1:1 volume ratio of 0.1 M MnSO<sub>4</sub> solution and 0.1 M (NH<sub>4</sub>)<sub>2</sub>S<sub>2</sub>O<sub>8</sub> solution in a 50 mL autoclave, followed by heat treatment at 140 °C for 12 h.<sup>[2]</sup> After the hydrothermal reactions, the product was filtered, washed with water and ethanol repeatedly, and dried at 60 °C for 24 h.

**1.2 Characterizations.** The crystal structures were analyzed by X-ray diffraction (XRD) using a PANalytical Empyrean diffractometer with Cu-K $\alpha$  radiation. The morphologies were investigated by HITACHI SU 8010 scanning electron microscope. The high resolution transmission electron microscopy (HRTEM) images were recorded on a JEM-ARM200F transmission electron microscope. The Mn concentrations in electrolytes were measured on an Avio500 inductively coupled plasma optical emission spectrometer. The specific surface areas were obtained by the Brunauer-Emmett-Teller (BET) method, and the isotherms were recorded by the DFT method to calculate the pore size distributions.

**1.3 Electrochemical characterization.** MnO<sub>2</sub> were mixed with KB or SP carbon, PVDF at the weight ratio of 7:2:1 in 1-methyl-2-pyrrolidinone (NMP). The slurry was drop casted on graphite paper substrate and dried at 90 °C. The BET area of the graphite paper was 19.45 m<sup>2</sup> g<sup>-1</sup>. The mass loading of MnO<sub>2</sub> active material was around 1.1 mg cm<sup>-2</sup>. Two-electrode cells were assembled with MnO<sub>2</sub> cathode, zinc foil anode, 1 M ZnSO<sub>4</sub> electrolyte and glass fiber separators. The glass fiber separators also enhanced the cycling stability of MnO<sub>2</sub> when comparing to filter paper (Figure S5), which would result from the different Mn<sup>2+</sup> ion mobilities. EIS was obtained in 3-electrode cells with saturated calomel electrode (SCE) as the reference on Biologic VMP3. Galvanostatic charge-discharge tests were carried out on Land CT-2001A battery cyclers.

## 2. Supporting Figures

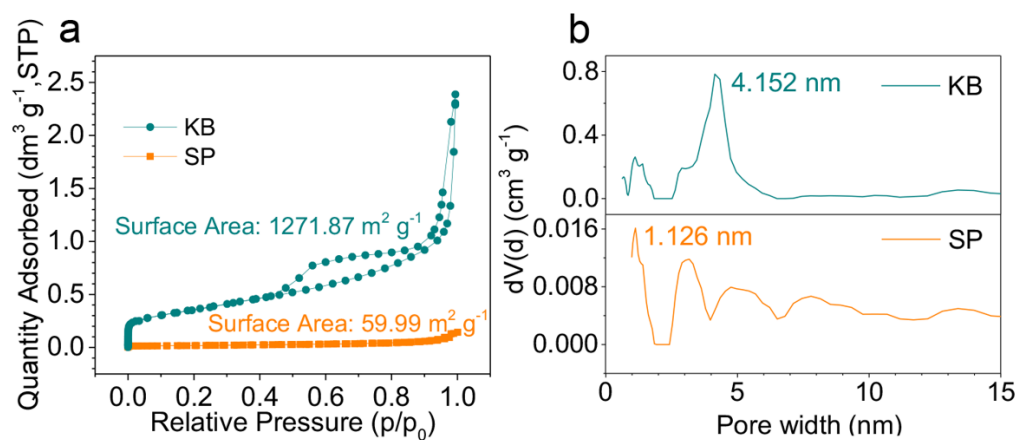

**Figure S1** a)  $\text{N}_2$  adsorption-desorption isotherms and b) pore size distributions of KB and SP carbons.

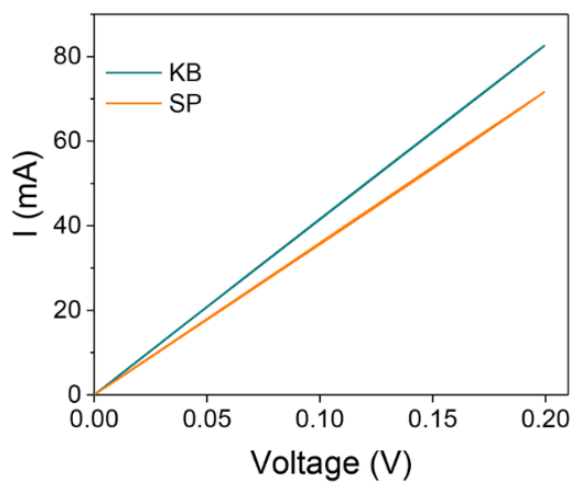

**Figure S2**  $I$ - $V$  plots of KB and SP carbons.

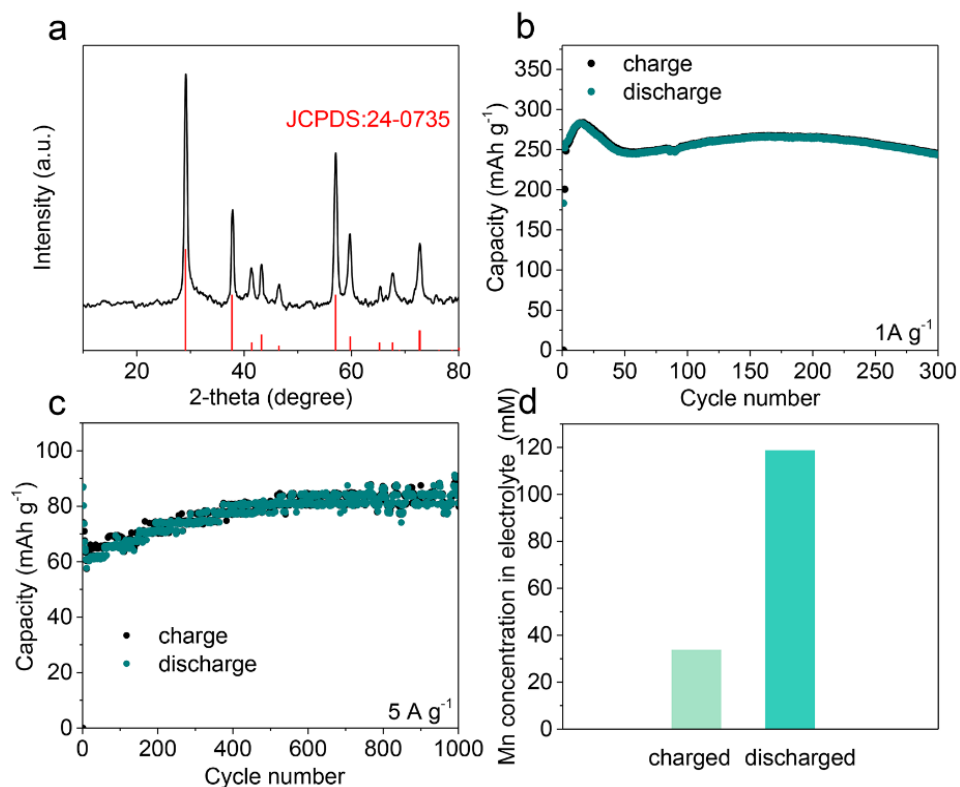

**Figure S3** a) XRD pattern of  $\beta$ -MnO<sub>2</sub>. Cycling performance of  $\beta$ -MnO<sub>2</sub> cathode with KB conductive agent in aqueous zinc batteries with 1 M ZnSO<sub>4</sub> electrolyte at b) 1 A g<sup>-1</sup>, c) 5 A g<sup>-1</sup>, and d) Mn concentrations in the electrolyte at the fully charged and discharged states of the 200<sup>th</sup> cycle of 1 A g<sup>-1</sup> test from ICP.

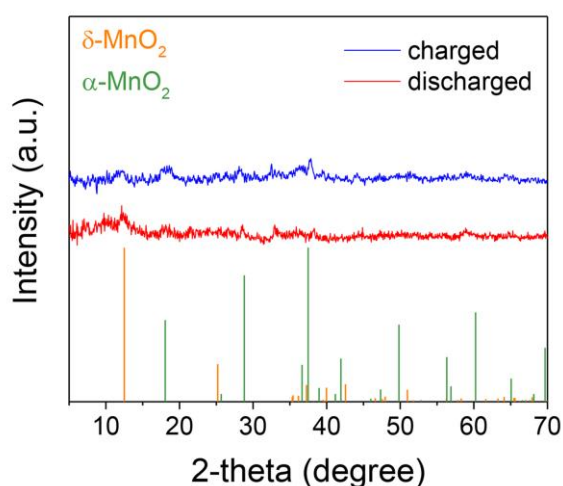

**Figure S4** XRD patterns of the MnO<sub>2</sub>/KB cathode at the charged and discharge states.

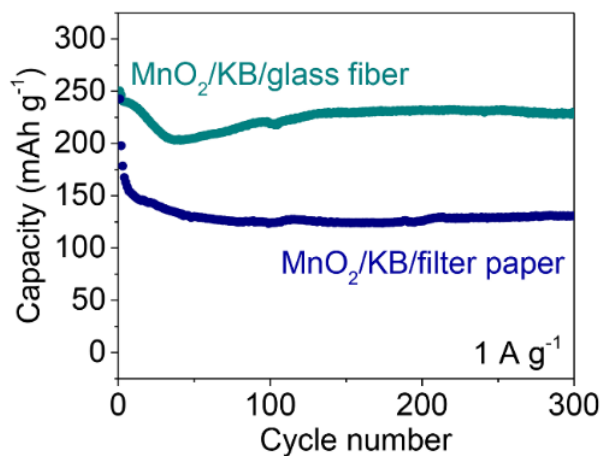

**Figure S5** Cycling performance of MnO<sub>2</sub>/KB with different separators in aqueous zinc batteries with 1 M ZnSO<sub>4</sub> electrolyte at 1 A g<sup>-1</sup>.

### 3. References

1. W. Chen, R. B. Rakhi, H. N. Alshareef, *J. Mater. Chem. A*, 2013, **1**, 3315-3324.
2. W. Liu, X. Zhang, Y. Huang, B. Jiang, Z. Chang, C. Xu, F. Kang, *J. Energy Chem.*, 2021, **56**, 365-373.
